# Supplementary material
Source: PubMed Central journal article supplement (PMC3143042)
Supplement: supp_mcr132_mcr132supp.pdf [file supp_mcr132_mcr132supp.pdf]

## SUPPLEMENTARY DATA

Mean values ( $\pm$  s.e.) for the indirect site factor (ISF), the direct site factor (DSF), photosynthetic capacity ( $A_{\max}$ ) and dark respiration ( $R_d$ ) for seven climbing plant species in a Chilean evergreen rainforest

| Species                       | ISF             | DSF             | $A_{\max}$ ( $\mu\text{mol m}^{-2}\text{s}^{-1}$ ) | $R_d$ ( $\mu\text{mol m}^{-2}\text{s}^{-1}$ ) |
|-------------------------------|-----------------|-----------------|----------------------------------------------------|-----------------------------------------------|
| <i>Boquila trifoliolata</i>   | $0.18 \pm 0.01$ | $0.14 \pm 0.03$ | $6.10 \pm 0.34^{\text{bc}}$                        | $0.27 \pm 0.02^{\text{ab}}$                   |
| <i>Cissus striata</i>         | $0.21 \pm 0.01$ | $0.22 \pm 0.02$ | $9.27 \pm 0.99^{\text{a}}$                         | $0.33 \pm 0.02^{\text{a}}$                    |
| <i>Elytropus chilensis</i>    | $0.22 \pm 0.01$ | $0.21 \pm 0.03$ | $7.07 \pm 0.68^{\text{ab}}$                        | $0.26 \pm 0.02^{\text{ab}}$                   |
| <i>Hydrangea serratifolia</i> | $0.17 \pm 0.01$ | $0.13 \pm 0.03$ | $5.00 \pm 0.29^{\text{bc}}$                        | $0.21 \pm 0.03^{\text{bc}}$                   |
| <i>Luzuriaga polyphylla</i>   | $0.16 \pm 0.02$ | $0.14 \pm 0.04$ | $5.74 \pm 0.58^{\text{bc}}$                        | $0.19 \pm 0.02^{\text{bc}}$                   |
| <i>Luzuriaga radicans</i>     | $0.16 \pm 0.01$ | $0.16 \pm 0.02$ | $4.42 \pm 0.24^{\text{c}}$                         | $0.17 \pm 0.02^{\text{c}}$                    |
| <i>Mitraria coccinea</i>      | $0.17 \pm 0.02$ | $0.16 \pm 0.01$ | $4.24 \pm 0.58^{\text{c}}$                         | $0.15 \pm 0.02^{\text{c}}$                    |
|                               | n.s.            | n.s.            | $F_{6,77} = 10.07, P < 0.001$                      | $F_{6,77} = 10.23, P < 0.001$                 |

Different letters indicate a significant difference between values ( $P < 0.05$ , Tukey HSD test)
